# Supplementary material
Source: publisher figshare collection journal article supplement (https://acs.figshare.com/ndownloader/files/5217388)

*Supporting data for*

**The Remarkable Axial Lability of Iron(III) Corrole Complexes**

Crisjoe A. Joseph and Peter C. Ford\*

*Department of Chemistry and Biochemistry; University of California, Santa Barbara, Santa Barbara, California 93106-9510, USA*

- Figure S-1** a) *Top*: Spectrum of **I** ( $1.8 \times 10^{-5}$  M) in toluene (solid red line) and spectrum of species regenerated after removal of the toluene by evacuating, dissolving in pyridine, photolyzing to labilize the coordinated NO, removal of the pyridine by evaluating, redissolving in toluene and adding NO (200 Torr) (dashed blue line). b) *Bottom*: Spectrum of species formed in pyridine after photolysis (see above procedure) (green line) and after removing the pyridine and redissolving the resulting solid to toluene (purple line). Figure 2b in the text is the difference between the purple plot in Fig-S1b and the red plot in S-1a.
- Figure S-2** *Top*: UV/Vis spectrum of **I** in toluene (red line) and in pyridine (blue line) under 200 Torr NO. *Bottom*: IR spectra of **I** in chloroform and in pyridine under NO.

**Figure S-1** a) *Top*: Spectrum of **I** ( $1.8 \times 10^{-5}$  M) in toluene (solid red line) and spectrum of species regenerated after removal of the toluene by evacuating, dissolving in pyridine, photolyzing to labilize the coordinated NO, removal of the pyridine by evaluating, redissolving in toluene and adding NO (200 Torr) (dashed blue line). b) *Bottom*: Spectrum of species formed in pyridine after photolysis (see above procedure) (green line) and after removing the pyridine and redissolving the resulting solid to toluene (purple line). Figure 2b in the text is the difference between the purple plot in Fig-S1b and the red plot in S-1a.

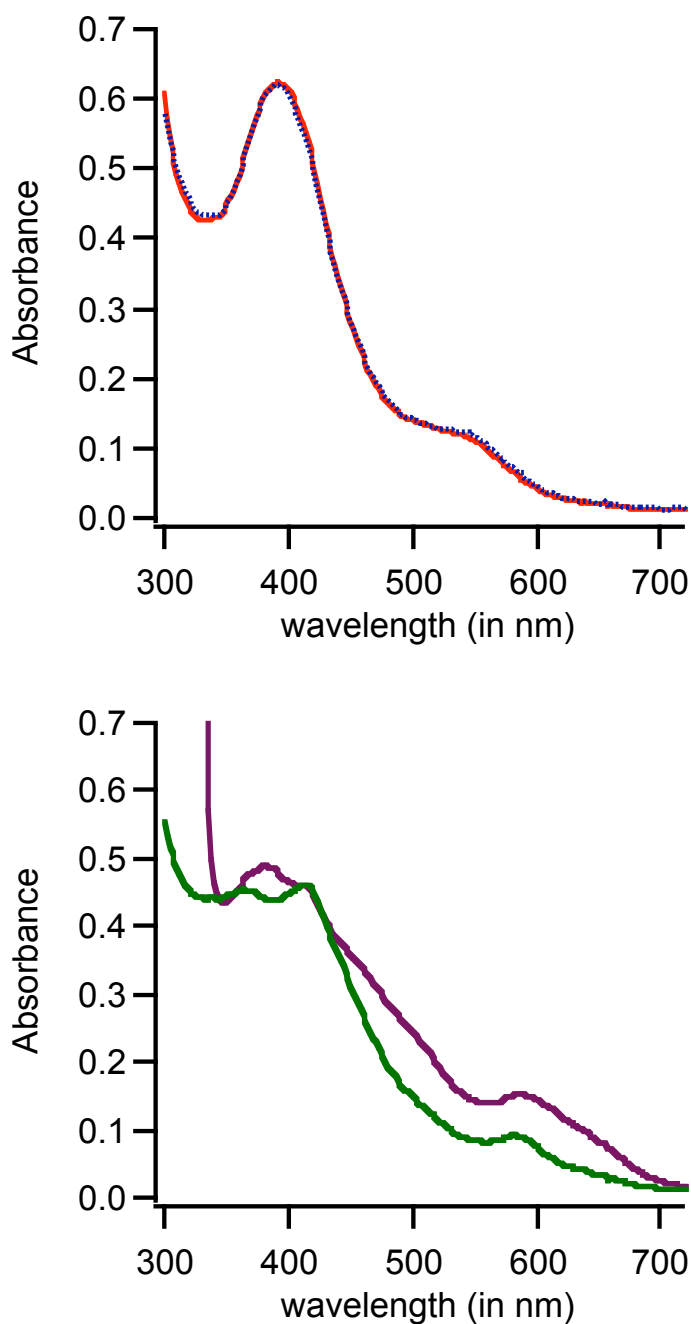

**Figure S-2** *Top:* UV/Vis spectrum of **I** in toluene (red line) and in pyridine (blue line) under 200 Torr NO. *Bottom:* IR spectra of **I** in chloroform and in pyridine under NO.

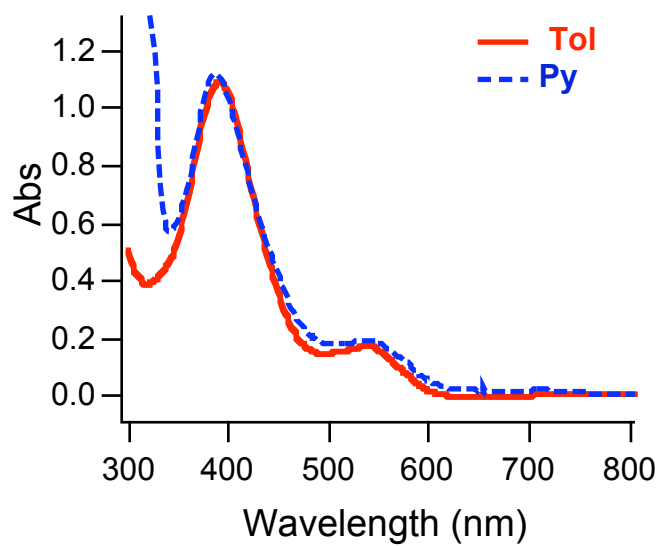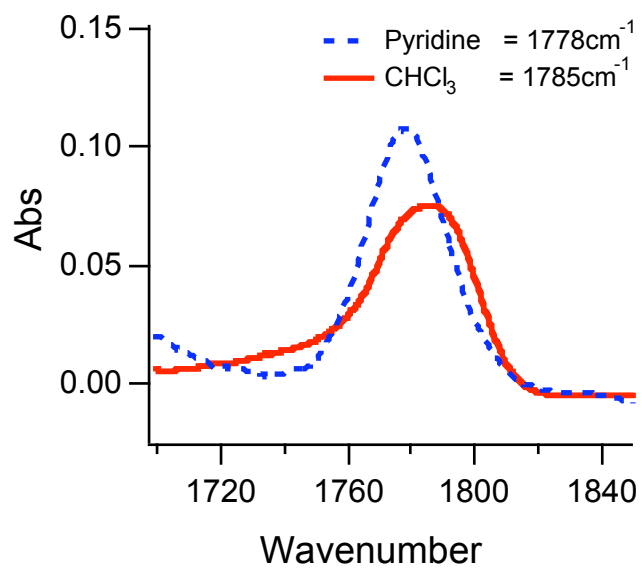

Supplement: Supplementary file 1 [file 5217388]
